# Supplementary material for: Flavor pleasantness processing in the ventral emotion network
Source: PubMed Central journal article supplement (PMC5312947; doi:10.1371/journal.pone.0170310), 2017-02-16
Supplement: pone.0170310.s004.pdf [file pone.0170310.s004.pdf]

RP IC1 (z=-10)

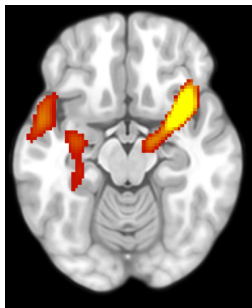

Regular Products IC1

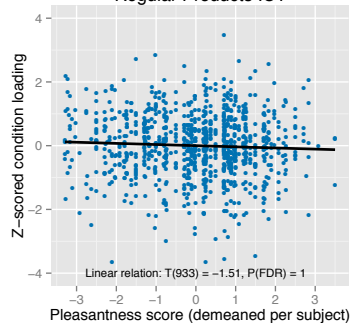

RP IC2 (z=2)

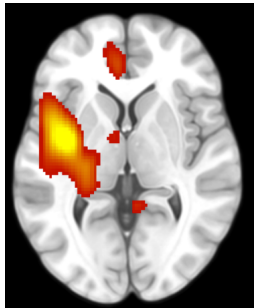

Regular Products IC2

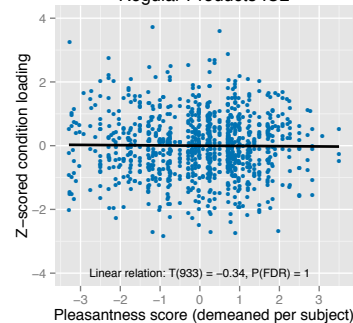

RP IC4 (z=-15)

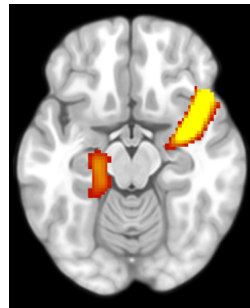

Regular Products IC4

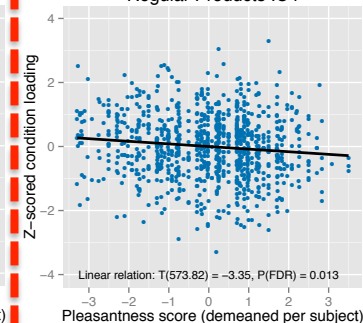

RP IC6 (z=15)

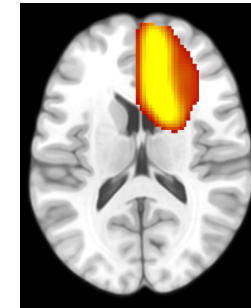

Regular Products IC6

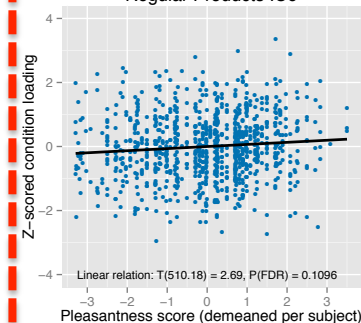

RP IC7 (z=-10)

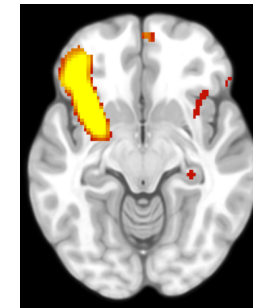

Regular Products IC7

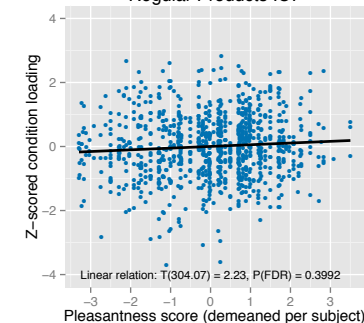

ONS IC9

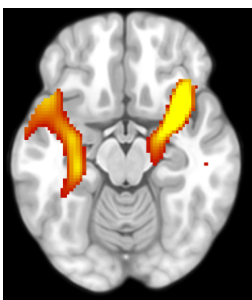

ONS IC9

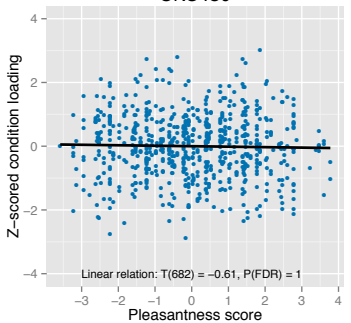

ONS IC2

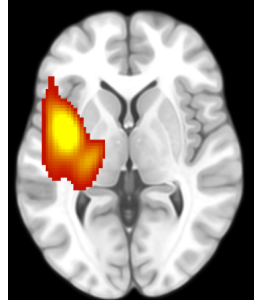

ONS IC2

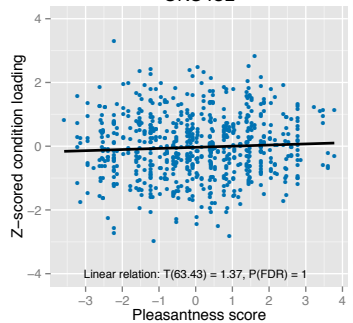

ONS IC10

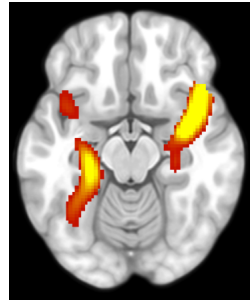

ONS IC10

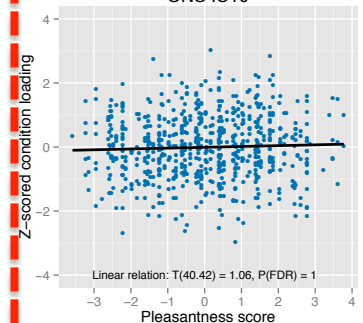

ONS IC13

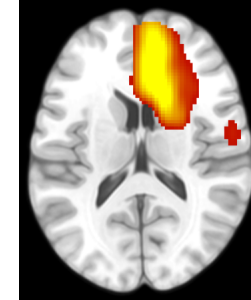

ONS IC13

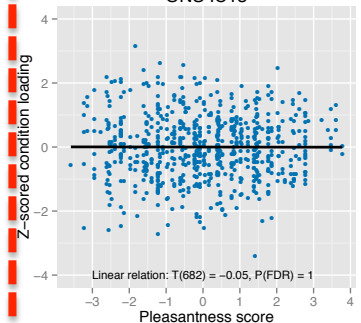

ONS IC7

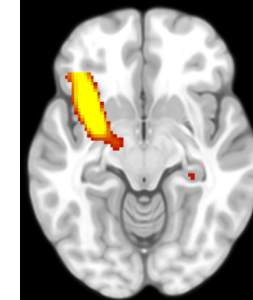

ONS IC7

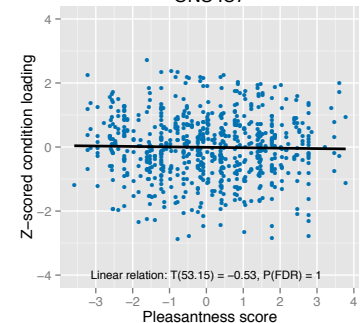

RP IC8 ( $x=0$ )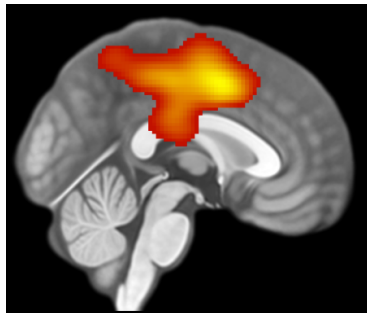

Regular Products IC8

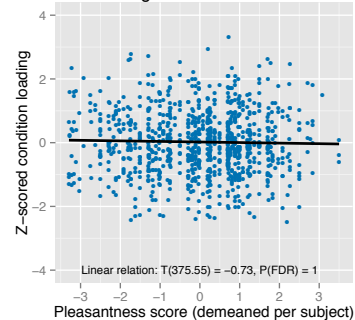RP IC10 ( $x=0$ )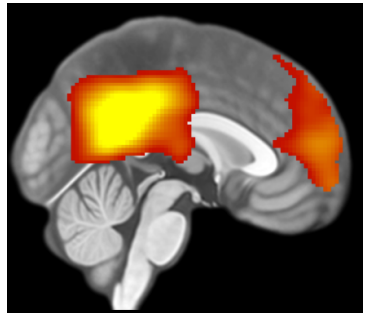

Regular Products IC10

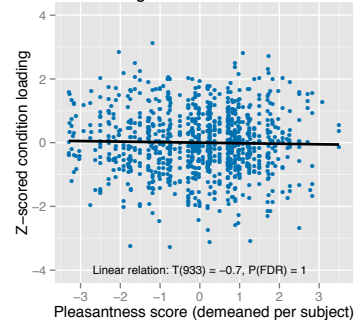RP IC11 ( $x=-20$ )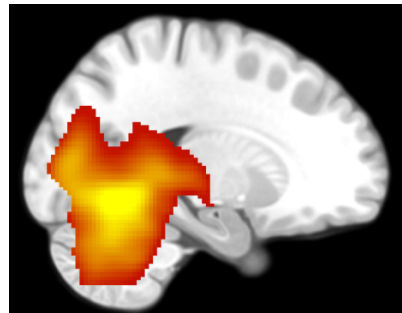

Regular Products IC11

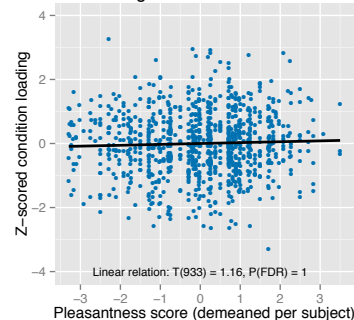RP IC13 ( $z=-10$ )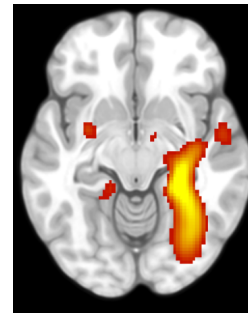

Regular Products IC13

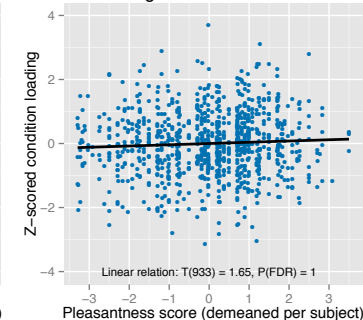RP IC14 ( $z=-30$ )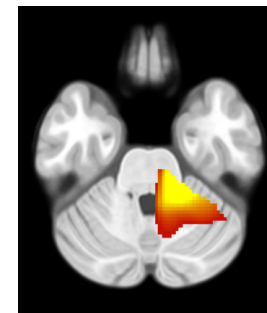

Regular Products IC14

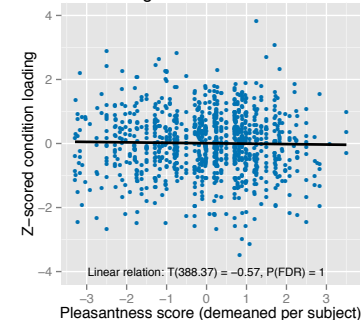

ONS IC12

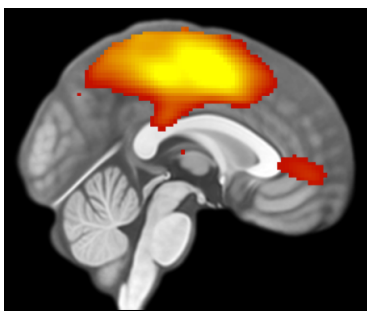

ONS IC12

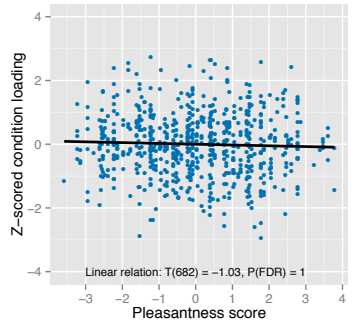

ONS IC4

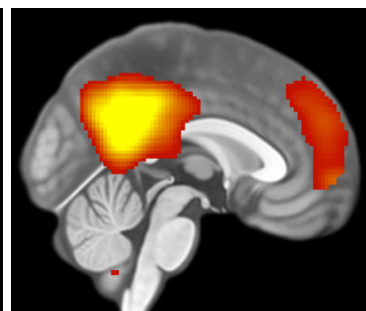

ONS IC4

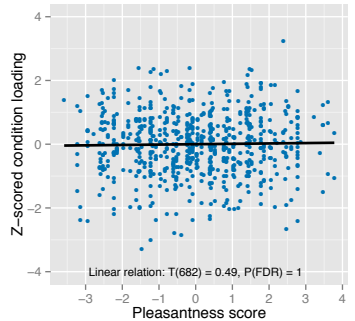ONS IC6 ( $x=20$ )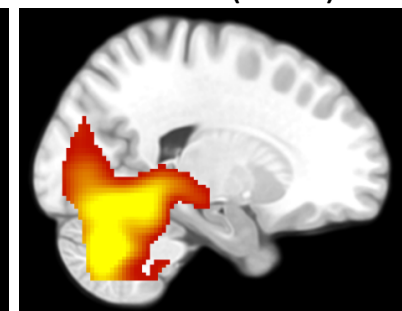

ONS IC6

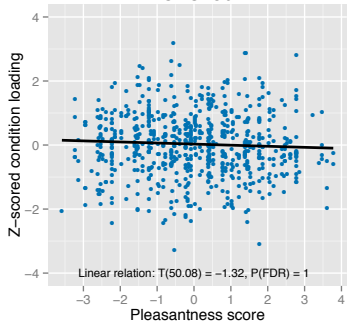

ONS IC1

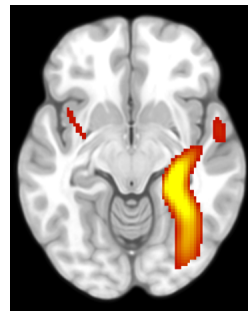

ONS IC1

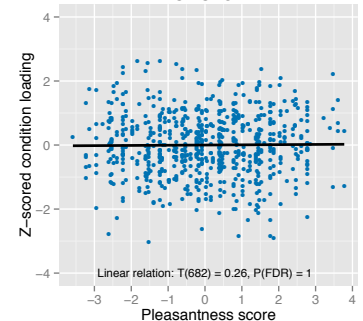

ONS IC8

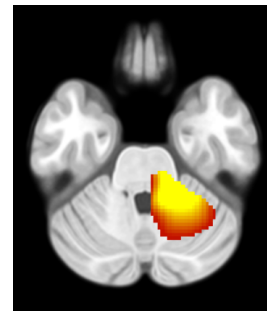

ONS IC8

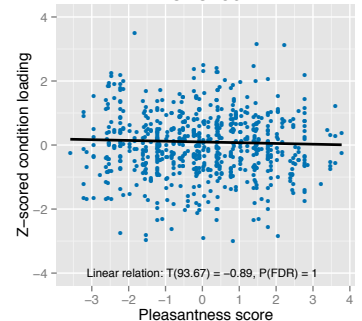

RP IC15 (x=0)

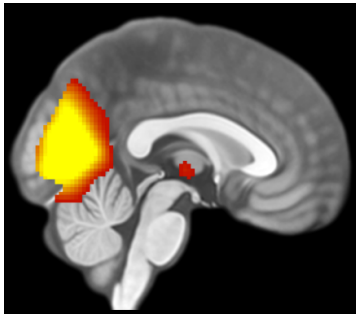

Regular Products IC15

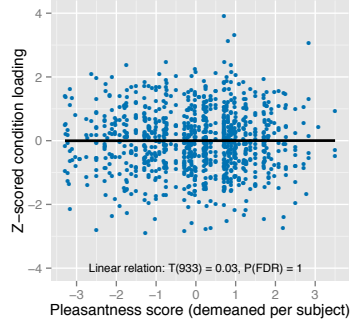

RP IC3 (z=2)

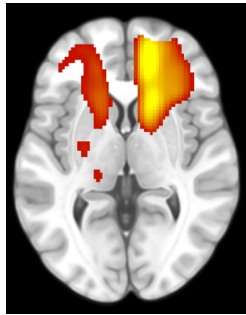

Regular Products IC3

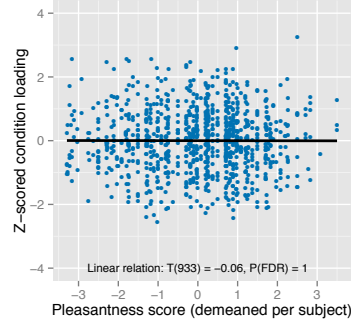

RP IC5 (x=0)

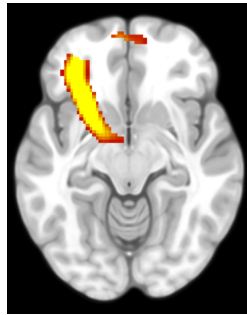

Regular Products IC5

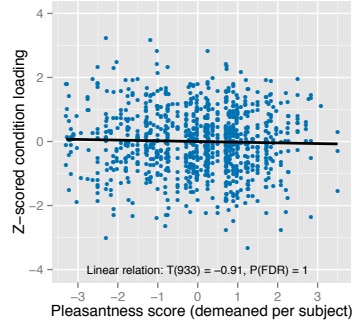

RP IC9 (z=34)

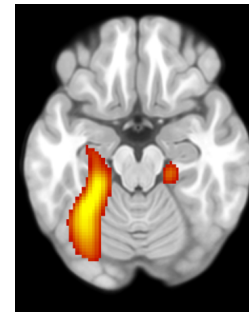

Regular Products IC9

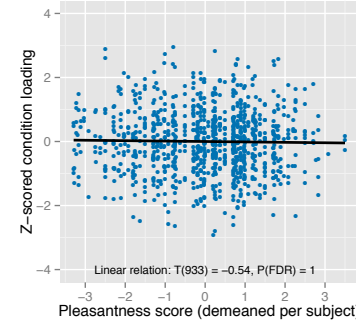

RP IC12 (z=0)

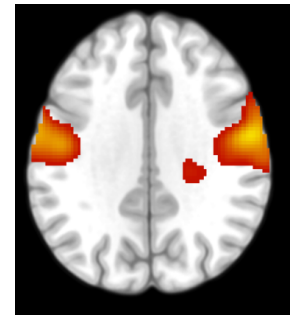

Regular Products IC12

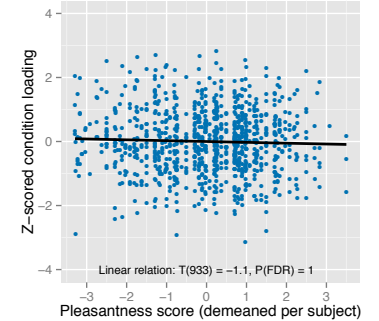

ONS IC3

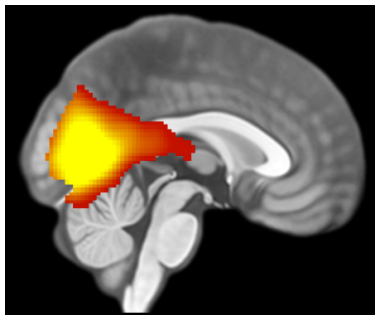

ONS IC3

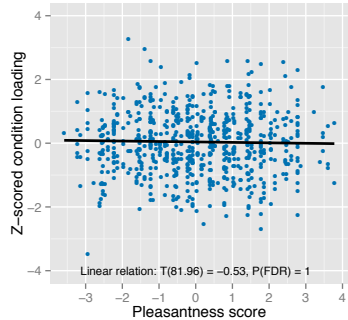

ONS IC5

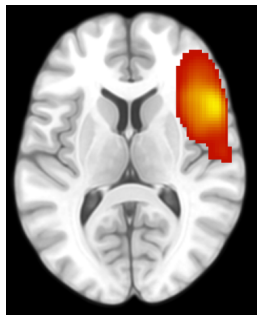

ONS IC5

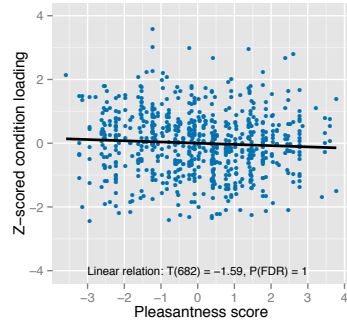

ONS IC11

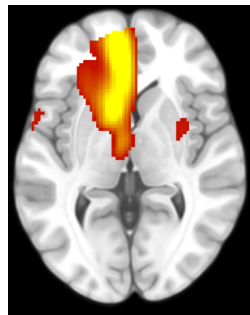

ONS IC11

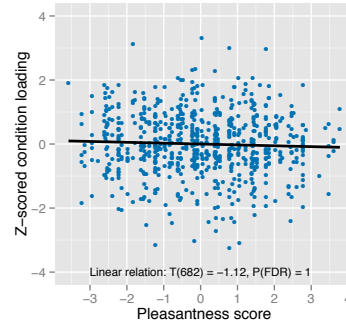

Coordinates: MNI

Color range IC maps:  $1 > z > 2$

Regression: linear mixed effect models

Model: IC loading  $\sim$  pleasantness + (1 | subject) + (1 | product)

Degrees of freedom: Satterthwaite approximation

P-values: FDR correction per dataset

RP: Regular Products dataset

ONS: Oral Nutritional supplements dataset

Red box: component associated with pleasantness

More details: see main text.
